# Supplementary material for: Methyl Jasmonate Affects Morphology, Number and Activity of Endoplasmic Reticulum Bodies in Raphanus sativus Root Cells
Source: Oxford University Press journal article supplement (doi:10.1093/pcp/pcu141), 2014-10-10
Supplement: pcu141_Supplementary_Data.zip [file pcu141_Supplementary_Data.zip]

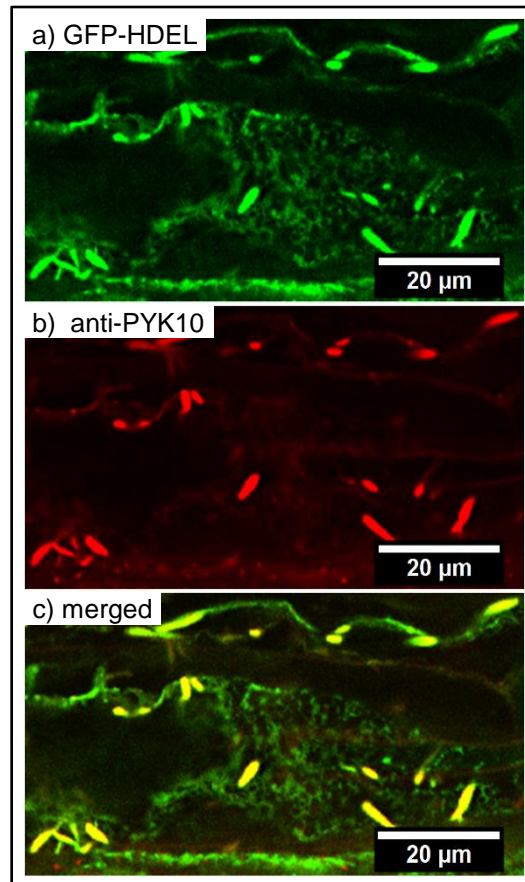

**S1. Immuno-fluorescent staining of root epidermal cells of *Arabidopsis* seedlings expressing GFP-HDEL with anti-PYK10 antibodies imaged by confocal microscopy**

GFP-HDEL fusion strongly labels ER bodies and the ER (a), whereas the anti-PYK10 antibodies coupled to TRITC label only ER bodies (b). Merging both channels reveals that GFP-HDEL and PYK10 colocalize (yellow; see (c)).

**Length**

| Contrast                  |                            | P value  | Significant |
|---------------------------|----------------------------|----------|-------------|
| Untreated                 | MeJA-72h - long ER bodies  | < 0.0001 | yes         |
| Untreated                 | MeJA-72h - small ER bodies | 0.480    | no          |
| MeJA-72h - long ER bodies | MeJA-72h - small ER bodies | < 0.0001 | yes         |

**Diameter**

| Contrast                  |                            | P value  | Significant |
|---------------------------|----------------------------|----------|-------------|
| Untreated                 | MeJA-72h - long ER bodies  | < 0.0001 | yes         |
| Untreated                 | MeJA-72h - small ER bodies | 0.611    | no          |
| MeJA-72h - long ER bodies | MeJA-72h - small ER bodies | < 0.0001 | Yes         |

**Density**

| Contrast                  |                            | P value  | Significant |
|---------------------------|----------------------------|----------|-------------|
| Untreated                 | MeJA-72h - long ER bodies  | 0.005    | yes         |
| Untreated                 | MeJA-72h - small ER bodies | < 0.0001 | yes         |
| MeJA-72h - long ER bodies | MeJA-72h - small ER bodies | < 0.0001 | yes         |

**S2. Statistical analysis results**

All the data were analyzed using pair wise comparison by Tukey's method.

### Evolution of ER bodies density along the root

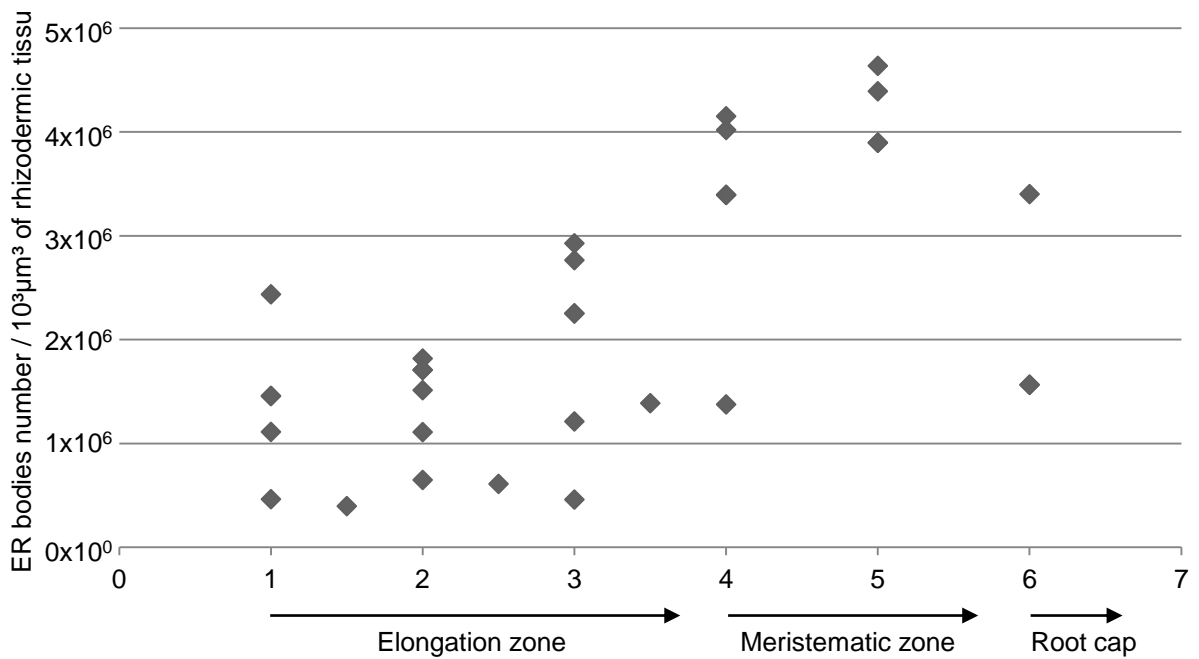

#### S3. ER bodies distribution along the root apex

ER bodies density is not linear along the root, in fact it increases from the elongation zone to get its maximum in the meristematic zone and then decreases in the root cap.

Each point correspond to one measurement.

Root parts: 1 to 3 = elongation zone; 4 and 5 = meristematic zone; 6 = root cap.
